# Supplementary material for: Genomic analysis of liver cancer unveils novel driver genes and distinct prognostic features
Source: PubMed Central journal article supplement — Theranostics. 2018 Feb 12;8(6):1740–51. doi: 10.7150/thno.22010 (PMC5858179; doi:10.7150/thno.22010), 2018-02-12
Supplement: thnov08p1740s1.pdf [file thnov08p1740s1.pdf]

**Title:** Genomic analysis of liver cancer unveils novel driver genes and distinct prognostic features

**Author(s):** Xiangchun Li, Weqi Xu, Wei Kang, Sunny H. Wong, Mengyao Wang, Yong Zhou, Xiaodong Fang, Xiuqing Zhang, Huanming Yang, Chi H. Wong, Ka F. To, Stephen L. Chan, Matthew T.V. Chan, Joseph J.Y. Sung, William K.K. Wu, Jun Yu

**Supplementary Materials**

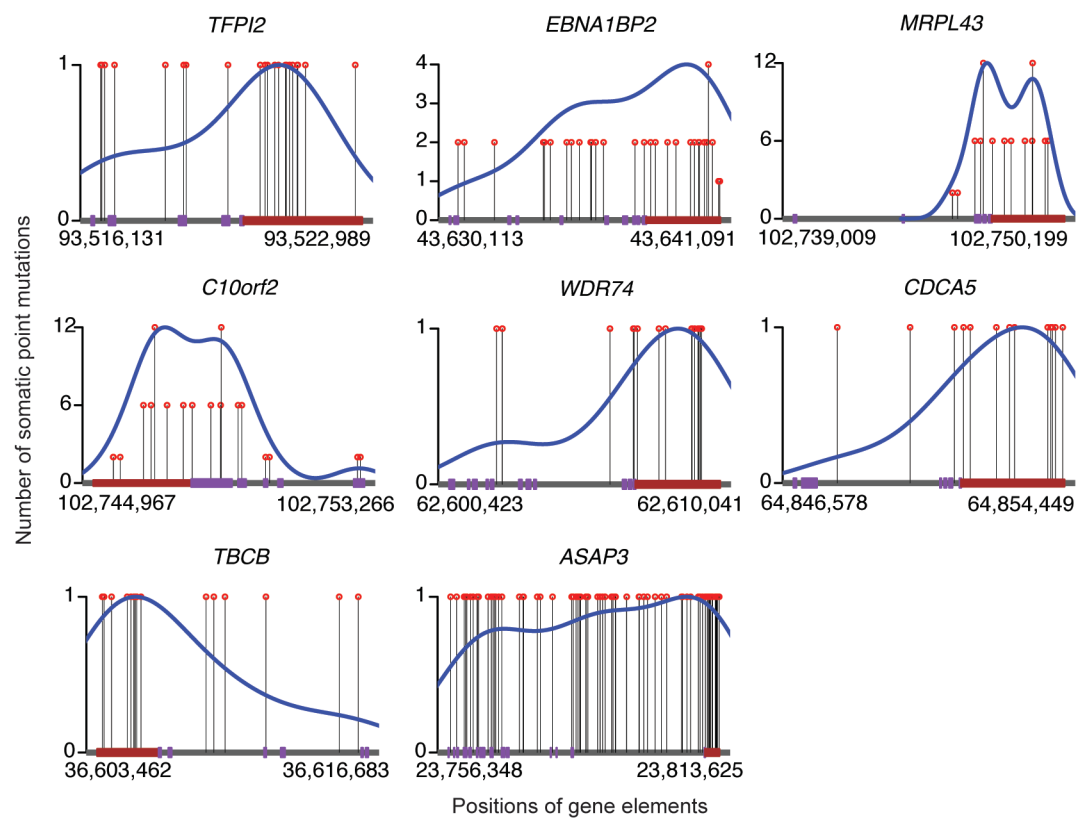

**Supplementary Figure 1** Genes enriched for promoter mutations.

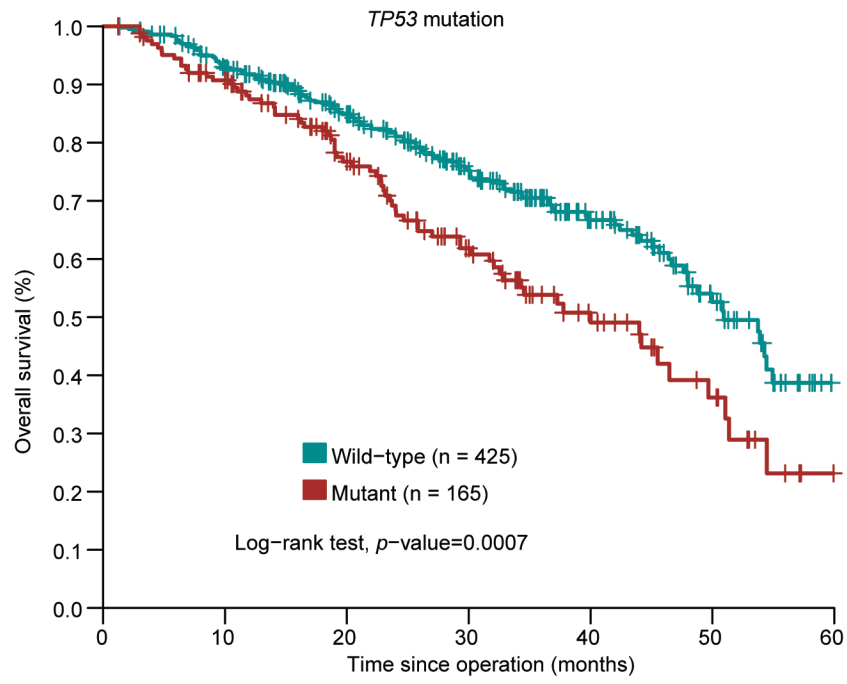

**Supplementary Figure 2** Kaplan-Meier survival analysis of *TP53* mutations.

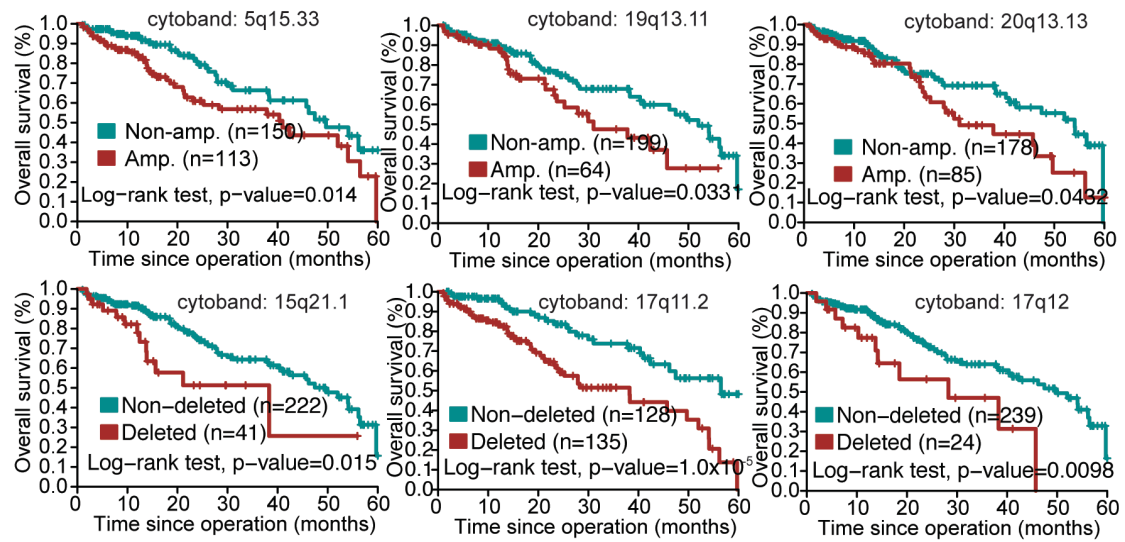

**Supplementary Figure 3** Kaplan-Meier survival analysis of focal amplification and deletion peaks.

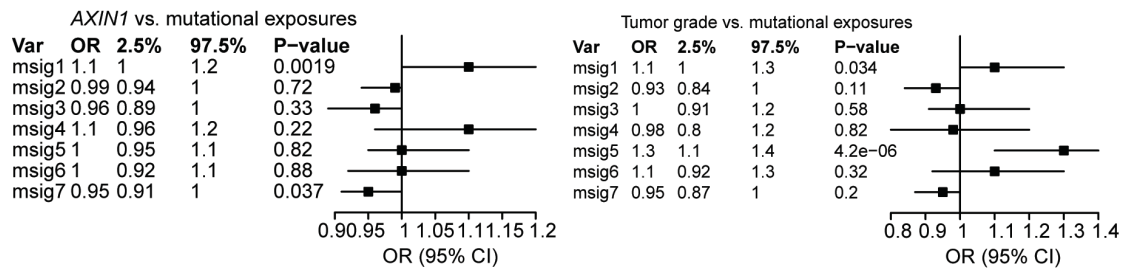

**Supplementary Figure 4 Correlation analysis of mutation signatures with tumor grade and *AXIN1* mutations.**

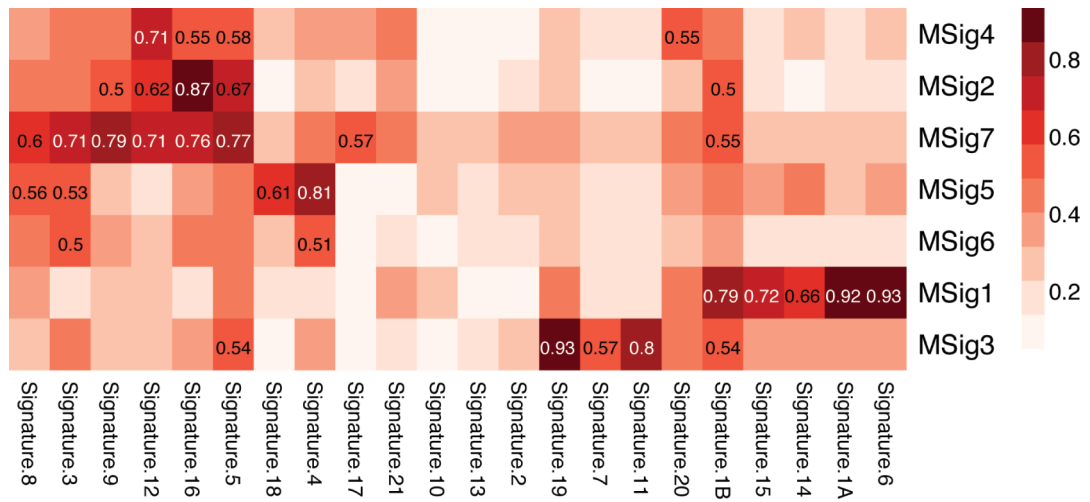

**Supplementary Figure 5** Cosine similarities among mutational signatures obtained from our study and COMSIC.

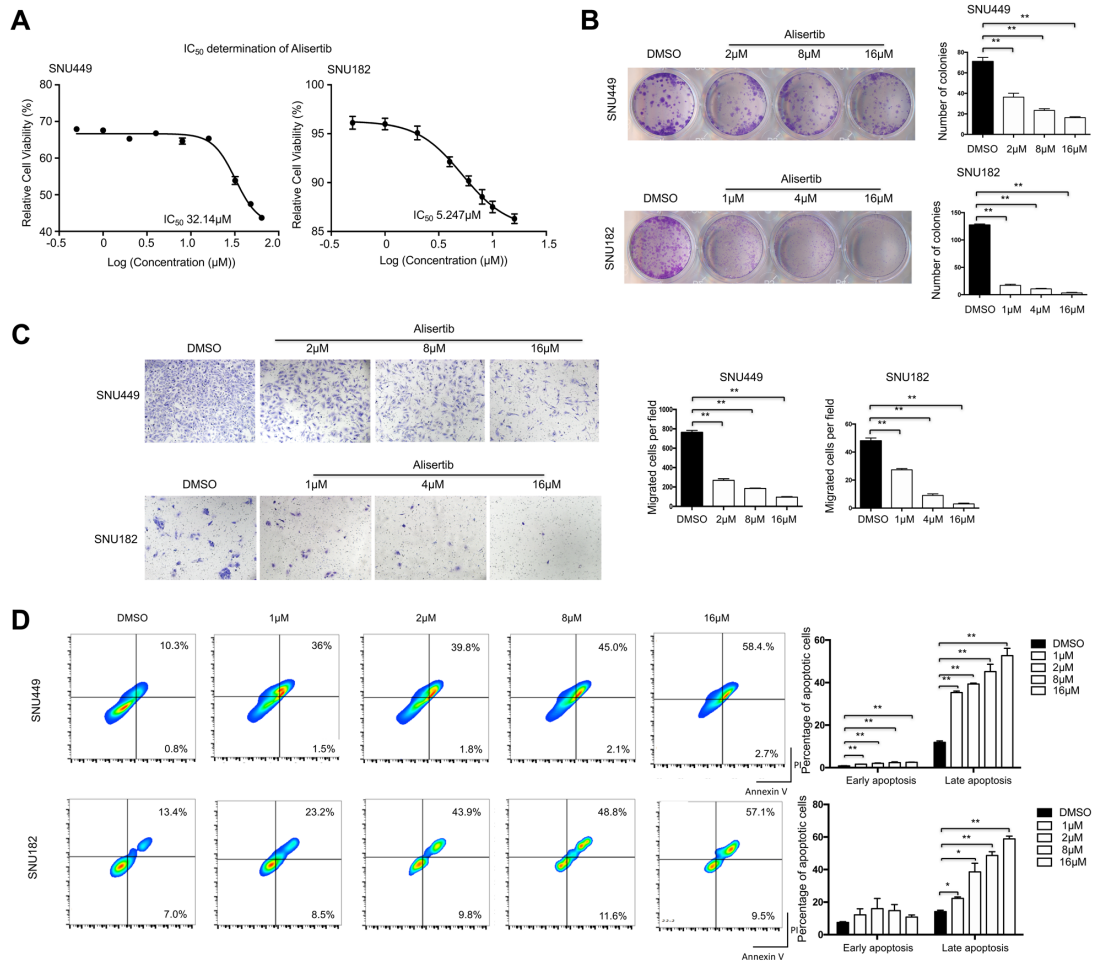

**Supplementary Figure 6** Effects of alisertib on (A) viability, (B) colony-forming ability, (C) migration and (D) apoptosis of SNU449 and SNU182 cells.

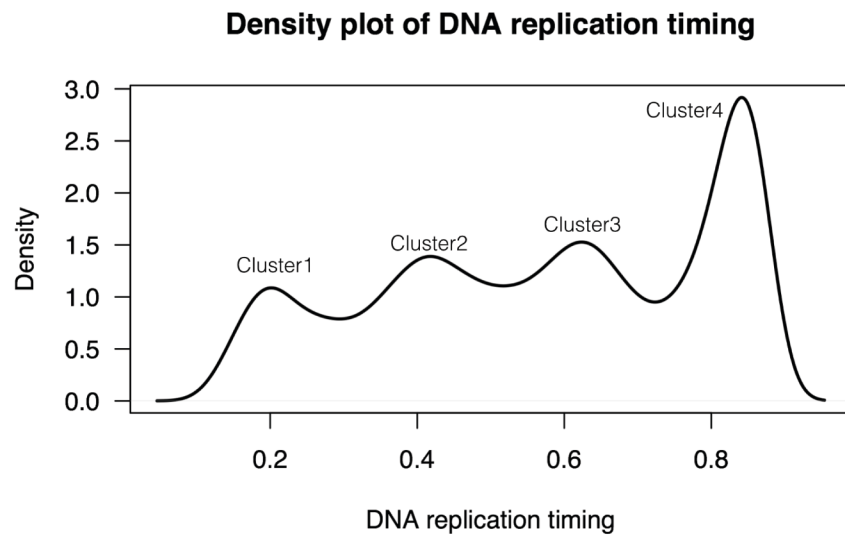

**Supplementary Figure 7**     **Density plot of DNA replication time data obtained from Chen et al.**

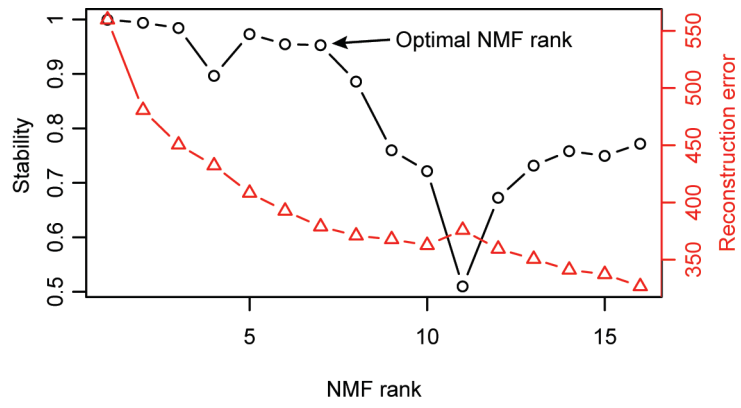

**Supplementary Figure 8** The stability and reconstruction error in extracting mutational signatures. Optimal rank was selected with high stability and low reconstruction error.





**Supplementary Table 2. Mutually exclusive SMGs.**

| Gene1  | Gene2  | CntGene1 | CntGene2 | AndCnt | XorCnt | Perm_CntGe | Perm_CntGe | Perm_AndCr | Perm_XorCn | Pvalue_And | Pvalue_Xor | Qvalue_And | Qvalue_Xor |
|--------|--------|----------|----------|--------|--------|------------|------------|------------|------------|------------|------------|------------|------------|
| ARID1A | KEAP1  | 100      | 30       | 0      | 130    | 100        | 30         | 3.3101     | 123.3798   | 1          | 0.0261     | 1          | 1          |
| ARID1A | TSC2   | 100      | 45       | 1      | 143    | 100        | 45         | 4.9727     | 135.0546   | 0.9959     | 0.0304     | 1          | 1          |
| ARID2  | AXIN1  | 72       | 62       | 1      | 132    | 72         | 62         | 4.9234     | 124.1532   | 0.9959     | 0.031      | 1          | 1          |
| AXIN1  | CTNNB1 | 62       | 249      | 5      | 301    | 62         | 249        | 16.5826    | 277.8348   | 1          | 3.00E-04   | 1          | 0.13545    |
| BAP1   | CTNNB1 | 26       | 249      | 3      | 269    | 26         | 249        | 6.9778     | 261.0444   | 0.9849     | 0.0495     | 1          | 1          |
| BAP1   | TERT   | 26       | 224      | 1      | 248    | 26         | 224        | 6.2717     | 237.4566   | 0.9993     | 0.005      | 1          | 0.7525     |
| BAP1   | TP53   | 26       | 296      | 3      | 316    | 26         | 296        | 8.251      | 305.498    | 0.9958     | 0.0163     | 1          | 1          |
| CDKN1A | TP53   | 15       | 296      | 1      | 309    | 15         | 296        | 4.7674     | 301.4652   | 0.9973     | 0.0269     | 1          | 1          |
| CTNNB1 | HNF4A  | 249      | 16       | 1      | 263    | 249        | 16         | 4.3166     | 256.3668   | 0.9946     | 0.0442     | 1          | 1          |
| CTNNB1 | PTEN   | 249      | 21       | 1      | 268    | 249        | 21         | 5.5988     | 258.8024   | 0.9992     | 0.0094     | 1          | 1          |
| CTNNB1 | RB1    | 249      | 40       | 2      | 285    | 249        | 40         | 10.694     | 267.612    | 0.9999     | 5.00E-04   | 1          | 0.1505     |
| CTNNB1 | TP53   | 249      | 296      | 54     | 437    | 249        | 296        | 77.3903    | 390.2194   | 1          | 0          | 1          | 0          |
| DYRK1A | TP53   | 14       | 296      | 1      | 308    | 14         | 296        | 4.426      | 301.148    | 0.9955     | 0.0349     | 1          | 1          |
| IL6ST  | TERT   | 30       | 224      | 2      | 250    | 30         | 224        | 7.2638     | 239.4724   | 0.9987     | 0.0108     | 1          | 1          |
| IL6ST  | TP53   | 30       | 296      | 3      | 320    | 30         | 296        | 9.5007     | 306.9986   | 0.9988     | 0.0043     | 1          | 0.7525     |
| RPL22  | TP53   | 15       | 296      | 0      | 311    | 15         | 296        | 4.7476     | 301.5048   | 1          | 0.0023     | 1          | 0.519225   |

Supplementary Table 3.

| Module ID | Genes               | Total Percent Altered | Total Altered Samples | Multiple Alterations | p-value | adjusted p-value |
|-----------|---------------------|-----------------------|-----------------------|----------------------|---------|------------------|
| M1        | CDKN1A [12], CTN    | 41.19%                | 437                   | 71                   | 0       | 0.01             |
| M2        | CDKN1A [12], CTN    | 41.19%                | 437                   | 69                   | 0       | 0.01             |
| M3        | AXIN1 [53], CTNNE   | 41.38%                | 439                   | 65                   | 0       | 0.01             |
| M4        | AXIN1 [53], CTNNE   | 25.54%                | 271                   | 9                    | 0.004   | 0.07             |
| M5        | AXIN1 [53], CTNNE   | 27.14%                | 288                   | 19                   | 0.008   | 0.15             |
| M6        | CTNNB1 [214], HNF   | 25.54%                | 271                   | 14                   | 0.016   | 0.23             |
| M7        | CDKN1A [12], JAK    | 39.87%                | 423                   | 78                   | 0.036   | 0.49             |
| M8        | IL6ST [24], MTOR [  | 6.97%                 | 74                    | 0                    | 0.042   | 0.59             |
| M9        | CDKN1A [12], CTN    | 26.11%                | 277                   | 20                   | 0.059   | 0.64             |
| M10       | CTNNB1 [214], HNF   | 28.09%                | 298                   | 27                   | 0.065   | 0.64             |
| M11       | PTEN [17], RPS6K    | 8.67%                 | 92                    | 1                    | 0.078   | 0.69             |
| M12       | PTEN [17], RPS6K    | 6.97%                 | 74                    | 0                    | 0.086   | 0.74             |
| M13       | MTOR [13], PIK3C    | 6.31%                 | 67                    | 0                    | 0.097   | 0.77             |
| M14       | CTNNB1 [214], HNF   | 28.46%                | 302                   | 29                   | 0.109   | 0.79             |
| M15       | CDKN1A [12], CTN    | 28.65%                | 304                   | 32                   | 0.118   | 0.79             |
| M16       | DYRK1A [12], RPS    | 8.20%                 | 87                    | 1                    | 0.149   | 0.95             |
| M17       | JAK1 [11], MTOR [   | 7.26%                 | 77                    | 1                    | 0.162   | 0.95             |
| M18       | CDKN1A [12], CDK    | 26.48%                | 281                   | 16                   | 0.181   | 0.95             |
| M19       | IL6ST [24], JAK1 [1 | 7.82%                 | 83                    | 2                    | 0.239   | 0.97             |
| M20       | CDKN1A [12], JAK    | 24.79%                | 263                   | 14                   | 0.243   | 0.97             |
| M21       | CDKN1A [12], MTC    | 8.95%                 | 95                    | 3                    | 0.255   | 0.97             |
| M22       | CDKN1A [12], JAK    | 26.96%                | 286                   | 19                   | 0.256   | 0.98             |
| M23       | CDKN1A [12], JAK    | 25.73%                | 273                   | 18                   | 0.261   | 0.98             |
| M24       | HNF4A [16], PTEN    | 9.90%                 | 105                   | 4                    | 0.278   | 0.98             |
| M25       | CTNNB1 [214], PIK   | 25.82%                | 274                   | 23                   | 0.303   | 0.98             |
| M26       | CDKN1A [12], IL6S   | 6.03%                 | 64                    | 1                    | 0.36    | 0.99             |
| M27       | CDKN1A [12], CTN    | 26.48%                | 281                   | 28                   | 0.382   | 1                |
| M28       | DYRK1A [12], TSC    | 6.31%                 | 67                    | 1                    | 0.471   | 1                |
| M29       | CDKN1A [12], JAK    | 6.31%                 | 67                    | 2                    | 0.501   | 1                |
| M30       | AXIN1 [53], GPAM    | 7.63%                 | 81                    | 2                    | 0.551   | 1                |
| M31       | CDKN1A [12], HNF    | 7.73%                 | 82                    | 3                    | 0.562   | 1                |
| M32       | CDKN1A [12], IL6S   | 6.88%                 | 73                    | 3                    | 0.614   | 1                |
| M33       | HNF1A [30], RPS6I   | 7.54%                 | 80                    | 3                    | 0.635   | 1                |
| M34       | CTNNB1 [214], RP    | 23.85%                | 253                   | 18                   | 0.659   | 1                |
| M35       | ERRFI1 [12], MTOF   | 4.24%                 | 45                    | 1                    | 0.742   | 1                |
| M36       | CDKN1A [12], MTC    | 26.11%                | 277                   | 28                   | 0.754   | 1                |
| M37       | CDKN1A [12], MTC    | 26.11%                | 277                   | 27                   | 0.768   | 1                |
| M38       | AXIN1 [53], TERT [  | 26.86%                | 285                   | 32                   | 0.789   | 1                |
| M39       | CTNNB1 [214], PIK   | 22.43%                | 238                   | 13                   | 0.796   | 1                |
| M40       | AXIN1 [53], GPAM    | 27.80%                | 295                   | 39                   | 0.805   | 1                |
| M41       | HNF1A [30], HNF4    | 8.77%                 | 93                    | 6                    | 0.807   | 1                |
| M42       | CDKN1A [12], CDK    | 24.69%                | 262                   | 20                   | 0.812   | 1                |
| M43       | DYRK1A [12], PTPN   | 3.68%                 | 39                    | 1                    | 0.839   | 1                |
| M44       | CDKN1A [12], PIK3   | 26.86%                | 285                   | 34                   | 0.843   | 1                |
| M45       | CDKN1A [12], CTN    | 22.53%                | 239                   | 14                   | 0.852   | 1                |
| M46       | CTNNB1 [214], JAK   | 23.00%                | 244                   | 18                   | 0.896   | 1                |
| M47       | CDKN1A [12], HNF    | 28.28%                | 300                   | 44                   | 0.938   | 1                |
| M48       | AXIN1 [53], CTNNE   | 36.85%                | 391                   | 98                   | 0.971   | 1                |
| M49       | CTNNB1 [214], HNF   | 36.85%                | 391                   | 98                   | 0.977   | 1                |
| M50       | CDKN1A [12], CTN    | 35.82%                | 380                   | 95                   | 0.996   | 1                |
| M51       | CDKN1A [12], CTN    | 36.48%                | 387                   | 104                  | 0.997   | 1                |
| M52       | CDKN1A [12], CTN    | 34.68%                | 368                   | 92                   | 0.999   | 1                |
| M53       | CDKN1A [12], PTE    | 3.58%                 | 38                    | 4                    | 1       | 1                |

Supplementary Table 4.

| gene                | pathway              | transit | C->A | flip | A->C | null+indel | obs.total.mut.num | exp.total.mut.num | p           | q           | Genes                                                                                                                                                                                                                          |
|---------------------|----------------------|---------|------|------|------|------------|-------------------|-------------------|-------------|-------------|--------------------------------------------------------------------------------------------------------------------------------------------------------------------------------------------------------------------------------|
| beta-catenin signal | Wnt/beta-catenin si  | 139     | 50   | 70   | 51   | 36         | 347               | 71.7689786        | 6.19E-121   | 1.98E-119   | APC, CTNBB1, AXIN2, TBL1XR1, SOX17                                                                                                                                                                                             |
| CellFate            | APC                  | 195     | 66   | 87   | 58   | 125        | 532               | 194.3248602       | 9.09E-89    | 1.45E-87    | FAM123B, AXIN1, GNAS, RNF43, CTNBB1, HNF1A, NF2, CDH1, APC, EP300, SOX9, KLF4                                                                                                                                                  |
| CellSurvival        | Cell Cycle/Apoptosi  | 164     | 87   | 78   | 38   | 165        | 534               | 245.191824        | 1.20E-87    | 1.28E-86    | DAXX, CDKN2A, TP53, CDC73, NFE2L2, CARD11, FUBP1, CASP8, PPP2R1A, TNFAIP3, MED12, CYLD, RB1, ABL1, MYD88, NPM1, BCL2, TRAF7                                                                                                    |
| GenomeMaintenance   | DNA Damage Cont      | 161     | 77   | 69   | 32   | 151        | 491               | 229.7693391       | 5.20E-81    | 4.21E-80    | BRC1, BRCA2, TP53, STAG2, MSH2, ATM, MLL1, MSH6, BAP1                                                                                                                                                                          |
| NFE2L               | NFE2L                | 28      | 4    | 10   | 15   | 11         | 69                | 15.0720966        | 8.94E-25    | 5.72E-24    | NFE2L2, NFE2L3                                                                                                                                                                                                                 |
| Genome integrity    | Genome integrity     | 189     | 82   | 76   | 35   | 154        | 537               | 353.0869553       | 3.99E-20    | 2.13E-19    | TP53, ATM, ATRX, BRCA2, ATR, STAG2, BAP1, BRCA1, SMC1A, SMC3, CHEK2, RAD21, ERCC2                                                                                                                                              |
| Cell cycle          | Cell cycle           | 25      | 12   | 13   | 7    | 66         | 126               | 62.9459902        | 8.78E-13    | 4.02E-12    | CDKN2A, RB1, CDK12, CDKN1B, CCND1, CDKN1A, CDKN2C                                                                                                                                                                              |
| Histone             | Histone              | 15      | 3    | 8    | 1    | 2          | 29                | 7.376354481       | 3.35E-10    | 1.34E-09    | HIST1H1C, H3F3C, HIST1H2BD                                                                                                                                                                                                     |
| TGF-beta signalling | TGF-beta signalling  | 28      | 13   | 11   | 9    | 30         | 91                | 49.46511579       | 4.19E-08    | 1.49E-07    | SMAD4, TGFBR2, ACVR1B, SMAD2, ACVR2A                                                                                                                                                                                           |
| PI3K signalling     | PI3K signalling      | 54      | 10   | 15   | 11   | 19         | 113               | 77.95541598       | 7.71E-05    | 0.00024668  | PIK3CA, PTEN, PIK3R1, TLR4, PIK3CG, AKT1                                                                                                                                                                                       |
| Proteolysis         | Proteolysis          | 26      | 9    | 6    | 1    | 9          | 51                | 30.5440448        | 0.000253856 | 0.00073849  | FBXW7, KEAP1, SPOP                                                                                                                                                                                                             |
| Ribosome            | Ribosome             | 4       | 4    | 5    | 0    | 10         | 23                | 10.74791539       | 0.000336601 | 0.000697603 | RPL22, RPL5                                                                                                                                                                                                                    |
| Metabolism          | Metabolism           | 13      | 5    | 5    | 1    | 2          | 26                | 16.96539691       | 0.014823838 | 0.036501766 | IDH1, IDH2                                                                                                                                                                                                                     |
| DNA methylation     | DNA methylation      | 14      | 5    | 5    | 3    | 10         | 39                | 38.09729461       | 0.400209938 | 0.914765572 | DNMT3A, TET2                                                                                                                                                                                                                   |
| CellSurvival        | STAT                 | 73      | 25   | 10   | 5    | 14         | 127               | 165.3287477       | 0.99886126  | 0.999999998 | CRLF2, MPL, FLT3, VHL, JAK2, JAK3, JAK1, SOCS1, KIT, FGFR2, FGFR3                                                                                                                                                              |
| CellFate            | Chromatin Modifica   | 228     | 71   | 75   | 38   | 275        | 691               | 758.2330846       | 0.992941177 | 0.999999998 | MEN1, MLL3, MLL2, EZH2, SETBP1, SMARCA4, NCOR1, DAXX, SETD2, ASXL1, DNMT1, KDM6A, H3F3A, ARID2, WT1, DNMT3A, SMARCB1, SPOP, IDH2, IDH1, TET2, PAX5, ATRX, EP300, HIST1H3B, ARID1B, ARID1A, PRDM1, PBRM1, CREBBP, KDM5C, SETBP1 |
| CellSurvival        | PI3K                 | 173     | 58   | 45   | 17   | 51         | 349               | 410.0290919       | 0.998890502 | 0.999999998 | PDGFRA, EGFR, RET, AKT1, B2M, TSHR, FLT3, TSC1, CE2PA, PTEN, PIK3CA, CSF1R, PIK3R1, ERBB2, VHL, FGFR2, FGFR3, GNAQ, ALK, GNAS, CBL, KIT, MET, GNA11, STK11                                                                     |
| CellSurvival        | MAPK                 | 27      | 8    | 9    | 1    | 4          | 49                | 74.18295569       | 0.998782336 | 0.999999998 | CEBPA, GNAQ, MAP3K1, TNFAIP3, B2M, GNA11, TSHR                                                                                                                                                                                 |
| CellFate            | Transcriptional Reg  | 57      | 12   | 14   | 6    | 10         | 99                | 134.1947503       | 0.999111677 | 0.999999998 | RUNX1, SRSF2, U2AF1, SF3B1, KLF4, AR, BCOR, PHF6, GATA3, CREBBP                                                                                                                                                                |
| CellFate            | HH                   | 13      | 5    | 9    | 0    | 4          | 31                | 48.47567444       | 0.995070604 | 0.999999998 | SMO, SPOP, PTCH1                                                                                                                                                                                                               |
| CellSurvival        | RAS                  | 187     | 53   | 45   | 29   | 39         | 353               | 463.9147826       | 0.999999995 | 0.999999998 | CIC, PDGFRA, NRAS, HRAS, EGFR, RET, VHL, MAP2K1, FLT3, CE2PA, MAP3K1, CSF1R, NF1, ERBB2, GNAQ, FGF2, FGF3, KRAS, ALK, GNAS, PTPN11, B2M, CBL, KIT, MET, BRAF, GNA11                                                            |
| CellFate            | NOTCH                | 38      | 10   | 12   | 6    | 8          | 75                | 136.9294207       | 0.999999995 | 0.999999998 | FBXW7, NOTCH1, NOTCH2, EP300, GATA2, GATA1                                                                                                                                                                                     |
| CellSurvival        | TGF-beta             | 49      | 16   | 18   | 6    | 13         | 102               | 140.9486307       | 0.999651564 | 0.999999998 | GNAS, SMAD4, ACVR1B, SMAD2, MED12, FOXL2, EP300, GATA2, GATA1                                                                                                                                                                  |
| regulator           | Transcription factor | 121     | 28   | 45   | 18   | 231        | 254.2103965       | 0.924471173       | 0.999999998 | 0.924471173 | VHL, GATA3, TSHZ3, EP300, CTCF, TAF1, TSHZ2, RUNX1, MECOM, TBX3, SIN3A, WT1, EIF4A2, FOXA1, PHF6, CBF5, SOX9, ELF3, VEZF1, CE2PA, FOXA2                                                                                        |
| Histone modifier    | Histone modifier     | 118     | 34   | 37   | 29   | 165        | 383               | 433.3381644       | 0.992537745 | 0.999999998 | MLL3, MLL2, ARID1A, PBRM1, SETD2, NSD1, SETBP1, KDM5C, KDM6A, MLL4, ARID5B, ASXL1, EZH2                                                                                                                                        |
| RTK signalling      | RTK signalling       | 93      | 44   | 30   | 4    | 19         | 191               | 191.5013737       | 0.495231966 | 0.999999998 | EGFR, FLT3, EPHA3, ERBB4, PDGFRA, EPHB6, FGFR2, KIT, FGFR3                                                                                                                                                                     |
| MAPK signalling     | MAPK signalling      | 51      | 5    | 12   | 18   | 18         | 104               | 130.1828191       | 0.989738738 | 0.999999998 | KRAS, NF1, MAP3K1, BRAF, NRAS, MAP2K4, MAPK8IP1                                                                                                                                                                                |
| Splicing            | Splicing             | 18      | 2    | 3    | 4    | 4          | 31                | 35.11277542       | 0.723034372 | 0.999999998 | SF3B1, U2AF1, PCBP1                                                                                                                                                                                                            |
| HPPD signalling     | HPPD signalling      | 6       | 1    | 1    | 1    | 1          | 10                | 16.71609572       | 0.943952406 | 0.999999998 | CDH1, AJUBA                                                                                                                                                                                                                    |
| Protein phosphatase | Protein phosphatase  | 9       | 1    | 1    | 2    | 0          | 13                | 25.96039298       | 0.996082606 | 0.999999998 | PPP2R1A, PTPN11                                                                                                                                                                                                                |
| TOR signalling      | TOR signalling       | 14      | 2    | 8    | 2    | 1          | 27                | 68.04981184       | 0.999999987 | 0.999999998 | MTOR, STK11                                                                                                                                                                                                                    |
| Other               | Other                | 106     | 44   | 41   | 16   | 44         | 251               | 356.319529        | 0.999999998 | 0.999999998 | NAV3, NOTCH1, LRRK2, MALAT1, ARHGAP35, POLO, NCOR1, USP9X, NPM1, HGF, EPPK1, AR, LIFR, PRX, CRIPAK, EGR3, B4GALT3, MIR142                                                                                                      |

Supplementary Table 5.

| gene_num | genes                                                                                                | weight   | sig_level | aggregated_mutation_frequency |
|----------|------------------------------------------------------------------------------------------------------|----------|-----------|-------------------------------|
| 2        | TP53,CTNNB1                                                                                          | 1.61E+02 | 0.05      | 0.531429                      |
| 3        | TP53,CDKN2A,RPL22                                                                                    | 1.59E+02 | 0.05      | 0.571429                      |
| 4        | TP53,CTNNB1,AXIN1,TNRC6B                                                                             | 1.69E+02 | 0         | 0.634286                      |
| 5        | TP53,IL6ST,CDKN2A,RPL22,CELF1                                                                        | 1.57E+02 | 0         | 0.608571                      |
| 6        | CTNNB1,AXIN1,HNF1A,BAP1,TNRC6B,PLEKHA5                                                               | 1.73E+02 | 0         | 0.591429                      |
| 7        | TP53,ARID2,BAP1,VAV3,LAMA3,CDKN2A,BRD7                                                               | 1.63E+02 | 0         | 0.611429                      |
| 8        | CTNNB1,AXIN1,HNF1A,TNRC6B,MACC1,HNF4A,CELF1,PLEKHA5                                                  | 1.77E+02 | 0         | 0.605714                      |
| 9        | CTNNB1,AXIN1,HNF1A,TNRC6B,MACC1,HNF4A,DYRK1A,PLEKHA5,HNRNPA2B1                                       | 1.74E+02 | 0         | 0.62                          |
| 10       | CTNNB1,AXIN1,HNF1A,BAP1,PTEN,MACC1,PCF11,HNF4A,CELF1,KRAS                                            | 1.64E+02 | 0         | 0.648571                      |
| 11       | CTNNB1,AXIN1,HNF1A,IL6ST,PIK3CA,MACC1,PCF11,HNF4A,CELF1,KRAS,MORC3                                   | 1.61E+02 | 0         | 0.654286                      |
| 12       | CTNNB1,AXIN1,HNF1A,IL6ST,TNRC6B,MACC1,PCF11,HNF4A,BRD7,CELF1,PLEKHA5,MORC3                           | 1.56E+02 | 0         | 0.651429                      |
| 13       | CTNNB1,TSC2,ACVR2A,HNF1A,IL6ST,KEAP1,PIK3CA,MACC1,HNF4A,CELF1,KRAS,MORC3,HNRNPA2B1                   | 1.44E+02 | 0         | 0.714286                      |
| 14       | CTNNB1,AXIN1,HNF1A,IL6ST,TNRC6B,MACC1,PCF11,HNF4A,DYRK1A,CELF1,KRAS,PLEKHA5,MORC3,HNRNPA2B1          | 1.45E+02 | 0         | 0.668571                      |
| 15       | ARID2,TSC2,ACVR2A,IL6ST,KEAP1,PTEN,MACC1,LAMA3,SRAP,CDKN2A,DYRK1A,BRD7,CELF1,PLEKHA5,HNRNPA2B1       | 1.21E+02 | 0.23      | 0.637143                      |
| 16       | CTNNB1,AXIN1,IL6ST,TNRC6B,PTEN,MACC1,LAMA3,PCF11,HNF4A,PTPN3,BRD7,CELF1,KRAS,PLEKHA5,MORC3,HNRNPA2B1 | 1.25E+02 | 0.05      | 0.66                          |

Supplementary Table 6.

| sample          | call status     | purity | ploidy | Cancer DNA fraction | Subclonal genome fraction |
|-----------------|-----------------|--------|--------|---------------------|---------------------------|
| TCGA-G3-A7M8-0  | low purity      | NA     | NA     | NA                  | NA                        |
| TCGA-UB-AA0V-0  | low purity      | NA     | NA     | NA                  | NA                        |
| TCGA-DD-A73C-0  | called          | 0.66   | 2.02   | 0.66                | 0                         |
| TCGA-G3-A3CI-0  | called          | 0.44   | 1.98   | 0.44                | 0                         |
| TCGA-DD-A3A6-0  | low purity      | NA     | NA     | NA                  | NA                        |
| TCGA-DD-A1ED-0  | low purity      | NA     | NA     | NA                  | NA                        |
| TCGA-2Y-A9GT-0  | called          | 0.41   | 3.99   | 0.58                | 0.06                      |
| TCGA-ED-A627-0  | low purity      | NA     | NA     | NA                  | NA                        |
| TCGA-DD-AACX-0  | called          | 0.91   | 4.01   | 0.95                | 0                         |
| TCGA-CC-A8HT-0  | called          | 0.5    | 1.98   | 0.49                | 0                         |
| TCGA-BD-A2L6-0  | called          | 0.61   | 4.13   | 0.76                | 0                         |
| TCGA-DD-A3A4-0  | called          | 0.52   | 3.93   | 0.68                | 0.01                      |
| TCGA-K7-A5RF-0  | high non-clonal | 0.91   | 2      | 0.91                | 0.2                       |
| TCGA-G3-A7M7-0  | called          | 0.62   | 2.12   | 0.64                | 0.02                      |
| TCGA-FV-A3R2-0  | called          | 0.76   | 2.09   | 0.77                | 0                         |
| TCGA-DD-A39W-0  | called          | 0.72   | 4.16   | 0.84                | 0                         |
| TCGA-DD-A3A2-0  | called          | 0.39   | 2.1    | 0.4                 | 0.11                      |
| TCGA-DD-AAEB-0  | called          | 0.82   | 2.1    | 0.83                | 0                         |
| TCGA-DD-A3A1-0  | called          | 0.68   | 2.11   | 0.7                 | 0                         |
| TCGA-2Y-A9GV-0  | called          | 0.71   | 1.95   | 0.7                 | 0                         |
| TCGA-DD-A4NI-0  | called          | 0.26   | 3.83   | 0.4                 | 0                         |
| TCGA-EP-A26S-0  | called          | 0.88   | 2.05   | 0.88                | 0                         |
| TCGA-G3-AAV3-0  | called          | 0.8    | 4.01   | 0.89                | 0.08                      |
| TCGA-DD-A1EB-0  | called          | 0.75   | 2.03   | 0.75                | 0                         |
| TCGA-WX-AA47-0  | called          | 0.9    | 4.15   | 0.95                | 0.01                      |
| TCGA-2Y-A9H7-0  | called          | 0.84   | 1.94   | 0.83                | 0                         |
| TCGA-DD-A1EC-0  | called          | 0.73   | 4.23   | 0.85                | 0.05                      |
| TCGA-CC-A9FV-0  | low purity      | NA     | NA     | NA                  | NA                        |
| TCGA-2Y-A9GX-0  | high non-clonal | 0.74   | 2      | 0.74                | 0.24                      |
| TCGA-FV-A495-0  | called          | 0.34   | 4.11   | 0.51                | 0                         |
| TCGA-DD-A4NB-0  | called          | 0.3    | 3.74   | 0.44                | 0                         |
| TCGA-G3-A5SJ-0  | called          | 0.73   | 2.08   | 0.74                | 0.04                      |
| TCGA-G3-A25V-0  | low purity      | NA     | NA     | NA                  | NA                        |
| TCGA-DD-A73A-0  | called          | 0.65   | 2.05   | 0.65                | 0                         |
| TCGA-MI-A75H-0  | called          | 0.65   | 2.1    | 0.66                | 0                         |
| TCGA-MI-A75E-0  | called          | 0.52   | 4.04   | 0.68                | 0.07                      |
| TCGA-FV-A23B-0  | called          | 0.82   | 1.98   | 0.81                | 0.02                      |
| TCGA-BC-4073-0  | called          | 0.54   | 1.94   | 0.53                | 0                         |
| TCGA-CC-5262-0  | called          | 0.57   | 3.96   | 0.72                | 0.04                      |
| TCGA-ED-A4XI-0  | called          | 0.45   | 3.97   | 0.62                | 0.16                      |
| TCGA-CC-5260-0  | called          | 0.27   | 4.62   | 0.46                | 0                         |
| TCGA-G3-AAV2-0  | called          | 0.84   | 2.1    | 0.84                | 0.09                      |
| TCGA-XR-A8TD-0  | called          | 0.45   | 2.02   | 0.45                | 0.01                      |
| TCGA-DD-AACM-0  | called          | 0.66   | 2.07   | 0.66                | 0.04                      |
| TCGA-DD-AAW3-0  | called          | 0.83   | 2.12   | 0.84                | 0.15                      |
| TCGA-LG-A9QD-0  | called          | 0.56   | 2.14   | 0.58                | 0.02                      |
| TCGA-BC-A10X-0  | low purity      | NA     | NA     | NA                  | NA                        |
| TCGA-G3-A7M5-0  | called          | 0.67   | 3.52   | 0.78                | 0.05                      |
| TCGA-HP-A5N0-0  | called          | 0.64   | 2      | 0.64                | 0.06                      |
| TCGA-UB-A7MD-0  | called          | 0.6    | 2.08   | 0.61                | 0.07                      |
| TCGA-ED-A8O5-0  | called          | 0.88   | 1.98   | 0.87                | 0.02                      |
| TCGA-DD-AAW0-0  | called          | 0.92   | 4.02   | 0.96                | 0.05                      |
| TCGA-DD-AAE7-0  | called          | 0.62   | 2.01   | 0.62                | 0.07                      |
| TCGA-5R-AAAM-0  | called          | 0.38   | 3.99   | 0.55                | 0                         |
| TCGA-DD-AAACH-0 | called          | 0.65   | 4.01   | 0.79                | 0.02                      |
| TCGA-FV-A3R3-0  | called          | 0.46   | 2.01   | 0.46                | 0.06                      |
| TCGA-DD-AAE4-0  | called          | 0.22   | 3.87   | 0.35                | 0                         |
| TCGA-DD-AAEH-0  | called          | 0.72   | 2.06   | 0.72                | 0.06                      |
| TCGA-GJ-A6C0-0  | called          | 0.35   | 3.95   | 0.51                | 0                         |
| TCGA-BD-A3ER-0  | called          | 0.48   | 2.09   | 0.49                | 0                         |
| TCGA-K7-AAU7-0  | called          | 0.51   | 2.14   | 0.53                | 0.02                      |
| TCGA-RC-A7S9-0  | called          | 0.27   | 4.4    | 0.45                | 0.13                      |
| TCGA-G3-A3CJ-0  | called          | 0.68   | 2.17   | 0.69                | 0.07                      |
| TCGA-ES-A2HT-0  | called          | 0.88   | 4.22   | 0.94                | 0                         |
| TCGA-BC-A10T-0  | called          | 0.47   | 4.06   | 0.64                | 0.01                      |
| TCGA-G3-A3CH-0  | called          | 0.48   | 3.86   | 0.64                | 0                         |
| TCGA-DD-AADK-0  | called          | 0.7    | 3.94   | 0.82                | 0.05                      |
| TCGA-G3-AAV0-0  | called          | 0.82   | 2.07   | 0.82                | 0.07                      |
| TCGA-EP-A12J-0  | called          | 0.81   | 2.03   | 0.81                | 0.03                      |
| TCGA-DD-AAEI-0  | called          | 0.75   | 2.11   | 0.76                | 0.04                      |
| TCGA-CC-A9FW-0  | called          | 0.85   | 4.06   | 0.92                | 0.03                      |
| TCGA-G3-AAV5-0  | called          | 0.81   | 2.29   | 0.83                | 0.06                      |
| TCGA-DD-A3A0-0  | called          | 0.27   | 3.91   | 0.42                | 0                         |
| TCGA-DD-A11B-0  | called          | 0.7    | 3.73   | 0.81                | 0.06                      |
| TCGA-DD-A4NH-0  | called          | 0.54   | 3.89   | 0.69                | 0.04                      |
| TCGA-DD-AACL-0  | called          | 0.3    | 3.84   | 0.45                | 0                         |
| TCGA-DD-A118-0  | called          | 0.55   | 3.03   | 0.65                | 0.03                      |
| TCGA-DD-AAVP-0  | called          | 0.85   | 2.01   | 0.85                | 0.08                      |
| TCGA-CC-A9FS-0  | called          | 0.63   | 3.85   | 0.77                | 0.09                      |
| TCGA-BC-A216-0  | called          | 0.25   | 4.22   | 0.41                | 0                         |
| TCGA-DD-A3A8-0  | called          | 0.73   | 2.07   | 0.73                | 0.18                      |
| TCGA-DD-A11D-0  | low purity      | NA     | NA     | NA                  | NA                        |
| TCGA-DD-A1EK-0  | called          | 0.31   | 3.79   | 0.47                | 0.01                      |
| TCGA-ED-A7PY-0  | called          | 0.72   | 4      | 0.83                | 0.04                      |
| TCGA-DD-AAC9-0  | called          | 0.56   | 2.11   | 0.57                | 0.08                      |
| TCGA-DD-AACT-0  | called          | 0.56   | 2.37   | 0.6                 | 0.09                      |
| TCGA-DD-AADA-0  | called          | 0.51   | 4.11   | 0.68                | 0.01                      |
| TCGA-MI-A75C-0  | called          | 0.67   | 2.19   | 0.69                | 0.11                      |
| TCGA-CC-5261-0  | called          | 0.51   | 4.19   | 0.68                | 0                         |
| TCGA-WX-AA46-0  | low purity      | NA     | NA     | NA                  | NA                        |
| TCGA-DD-AACK-0  | called          | 0.63   | 4.03   | 0.77                | 0.02                      |
| TCGA-RC-A7SB-0  | called          | 0.67   | 3.67   | 0.79                | 0.08                      |
| TCGA-ZP-A9CV-0  | called          | 0.65   | 2.06   | 0.65                | 0.07                      |

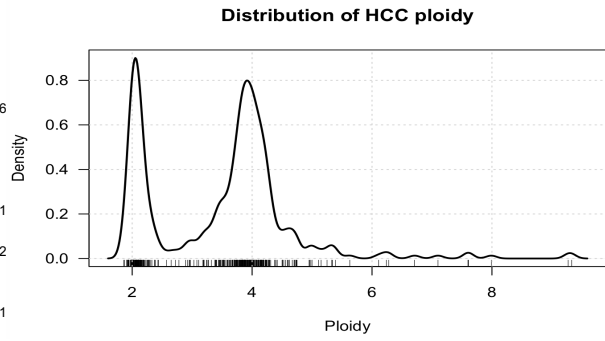

|                                 |      |      |      |      |
|---------------------------------|------|------|------|------|
| TCGA-DD-A4NK-0 called           | 0.89 | 2.2  | 0.9  | 0.06 |
| TCGA-DD-AADP-0 called           | 0.62 | 3.79 | 0.76 | 0.06 |
| TCGA-DD-AADY-0 called           | 0.92 | 3.48 | 0.95 | 0.09 |
| TCGA-DD-A4NF-0 called           | 0.77 | 2.1  | 0.78 | 0.06 |
| TCGA-DD-AACF-0 called           | 0.86 | 2.16 | 0.87 | 0.05 |
| TCGA-DD-AAEG-0 called           | 0.33 | 4.51 | 0.52 | 0    |
| TCGA-DD-A4NL-0 low purity       | NA   | NA   | NA   | NA   |
| TCGA-WX-AA44-0 called           | 0.29 | 4.14 | 0.46 | 0    |
| TCGA-DD-A4NP-0 called           | 0.79 | 2.03 | 0.79 | 0.03 |
| TCGA-DD-AAC8-0 called           | 0.81 | 3.08 | 0.87 | 0.05 |
| TCGA-G3-A25W-0 called           | 0.71 | 4.24 | 0.84 | 0    |
| TCGA-3K-AAZ8-01 called          | 0.67 | 3.64 | 0.79 | 0.1  |
| TCGA-DD-AAD0-0 called           | 0.95 | 2.01 | 0.95 | 0.01 |
| TCGA-DD-AAW1-0 called           | 0.74 | 2.09 | 0.75 | 0.14 |
| TCGA-CC-A5UD-0 called           | 0.8  | 2.65 | 0.85 | 0.07 |
| TCGA-BC-A69I-01 called          | 0.81 | 2.03 | 0.81 | 0.03 |
| TCGA-G3-A6UC-0 called           | 0.88 | 2.14 | 0.88 | 0.08 |
| TCGA-ZS-A9CG-0 called           | 0.75 | 2.11 | 0.76 | 0.16 |
| TCGA-DD-A39V-01 called          | 0.65 | 2.31 | 0.68 | 0.07 |
| TCGA-DD-AACQ-0 called           | 0.93 | 3.94 | 0.96 | 0.01 |
| TCGA-DD-A4NR-0 called           | 0.35 | 2.18 | 0.37 | 0.06 |
| TCGA-T1-A6J8-01 called          | 0.64 | 3.45 | 0.75 | 0.2  |
| TCGA-FV-A4ZQ-01 called          | 0.74 | 3.38 | 0.83 | 0.06 |
| TCGA-G3-AAUZ-0 called           | 0.37 | 4.25 | 0.55 | 0.01 |
| TCGA-ZP-A9D0-01 called          | 0.71 | 1.94 | 0.71 | 0.09 |
| TCGA-KR-A7K7-01 called          | 0.58 | 2.78 | 0.66 | 0.09 |
| TCGA-FV-A2QQ-0 called           | 0.26 | 3.82 | 0.4  | 0    |
| TCGA-DD-A4ND-0 called           | 0.65 | 4.15 | 0.79 | 0.04 |
| TCGA-ZP-A9CY-01 called          | 0.72 | 2.01 | 0.72 | 0.03 |
| TCGA-DD-A3A9-01 called          | 0.79 | 4.96 | 0.9  | 0.01 |
| TCGA-WJ-A86L-01 called          | 0.4  | 4.1  | 0.58 | 0.01 |
| TCGA-FV-A2QR-0 called           | 0.8  | 2.02 | 0.81 | 0.1  |
| TCGA-DD-AAE3-0 called           | 0.63 | 4.5  | 0.79 | 0.07 |
| TCGA-DD-A73D-0 called           | 0.82 | 4.73 | 0.91 | 0.08 |
| TCGA-ZP-A9CZ-01 called          | 0.64 | 1.97 | 0.64 | 0.09 |
| TCGA-BC-A10Z-01 called          | 0.35 | 5.11 | 0.58 | 0.03 |
| TCGA-DD-AAVR-0 called           | 0.49 | 2.13 | 0.51 | 0.02 |
| TCGA-DD-A4NS-0 low purity       | NA   | NA   | NA   | NA   |
| TCGA-DD-AADU-0 called           | 0.67 | 2.57 | 0.73 | 0.08 |
| TCGA-2Y-A9H8-01 called          | 0.83 | 4.11 | 0.91 | 0.04 |
| TCGA-EP-A3RK-0 called           | 0.41 | 1.92 | 0.4  | 0.03 |
| TCGA-DD-AAVU-0 called           | 0.92 | 3.41 | 0.95 | 0.1  |
| TCGA-ZS-A9CD-01 called          | 0.86 | 4.18 | 0.93 | 0.11 |
| TCGA-ED-A66X-01 called          | 0.31 | 3.39 | 0.43 | 0.15 |
| TCGA-DD-A73B-01 called          | 0.74 | 3.54 | 0.84 | 0.07 |
| TCGA-DD-A1EE-0 high non-clonal  | 0.7  | 2.15 | 0.71 | 0.26 |
| TCGA-G3-A5SL-01 high non-clonal | 0.78 | 2.26 | 0.8  | 0.35 |
| TCGA-DD-AAD2-0 called           | 0.57 | 4.28 | 0.74 | 0.01 |
| TCGA-5C-AAPD-0 called           | 0.39 | 3.63 | 0.54 | 0.1  |
| TCGA-2Y-A9H0-01 called          | 0.43 | 4.13 | 0.61 | 0.02 |
| TCGA-G3-A5SI-01 called          | 0.98 | 4.02 | 0.99 | 0.17 |
| TCGA-DD-AADS-0 called           | 0.51 | 4.17 | 0.68 | 0.04 |
| TCGA-DD-AAE9-0 called           | 0.66 | 2.39 | 0.7  | 0.16 |
| TCGA-DD-AAD3-0 called           | 0.66 | 1.94 | 0.66 | 0.11 |
| TCGA-ED-A5KG-0 low purity       | NA   | NA   | NA   | NA   |
| TCGA-RC-A6M4-0 called           | 0.79 | 3.77 | 0.88 | 0.11 |
| TCGA-MR-A520-01 low purity      | NA   | NA   | NA   | NA   |
| TCGA-HP-A5MZ-0 called           | 0.75 | 2.1  | 0.76 | 0.11 |
| TCGA-DD-AADB-0 called           | 0.34 | 7.1  | 0.65 | 0    |
| TCGA-QA-A7B7-01 called          | 0.79 | 1.86 | 0.78 | 0.05 |
| TCGA-ED-A7XO-0 called           | 0.26 | 3.89 | 0.4  | 0    |
| TCGA-UB-A7MF-0 high non-clonal  | 0.56 | 3.7  | 0.71 | 0.28 |
| TCGA-DD-AADJ-0 called           | 0.78 | 3.89 | 0.87 | 0.01 |
| TCGA-BC-A5W4-0 called           | 0.93 | 3.6  | 0.96 | 0.09 |
| TCGA-2Y-A9H4-01 called          | 0.79 | 3.9  | 0.88 | 0.04 |
| TCGA-DD-A4NV-0 called           | 0.52 | 2.44 | 0.57 | 0.15 |
| TCGA-DD-A1E9-01 called          | 0.31 | 4.29 | 0.49 | 0    |
| TCGA-XR-A8TE-01 called          | 0.7  | 2.21 | 0.72 | 0.08 |
| TCGA-UB-A7MA-0 called           | 0.66 | 4.27 | 0.8  | 0.05 |
| TCGA-O8-A75V-01 called          | 0.49 | 2.37 | 0.53 | 0.1  |
| TCGA-DD-AACN-0 called           | 0.59 | 3.84 | 0.73 | 0.17 |
| TCGA-2Y-A9H6-01 called          | 0.48 | 3.81 | 0.64 | 0.03 |
| TCGA-DD-AAAC-0 called           | 0.51 | 4    | 0.67 | 0.08 |
| TCGA-DD-AAVQ-0 called           | 0.36 | 3.75 | 0.51 | 0.05 |
| TCGA-BW-A5NQ-0 high non-clonal  | 0.76 | 3.55 | 0.85 | 0.29 |
| TCGA-LG-A9QC-0 called           | 0.78 | 1.93 | 0.77 | 0.01 |
| TCGA-DD-AACA-0 called           | 0.89 | 4.08 | 0.94 | 0.03 |
| TCGA-DD-AACV-0 called           | 1    | 3.76 | 1    | 0.15 |
| TCGA-2Y-A9GZ-01 called          | 0.87 | 3.39 | 0.92 | 0.06 |
| TCGA-DD-A39Z-01 called          | 0.76 | 2.08 | 0.77 | 0.15 |
| TCGA-DD-A1EA-0 called           | 0.71 | 2.14 | 0.72 | 0.14 |
| TCGA-DD-AAEA-0 called           | 0.53 | 4.22 | 0.7  | 0.03 |
| TCGA-DD-AADG-0 called           | 0.83 | 4.18 | 0.91 | 0.1  |
| TCGA-WQ-A9G7-0 called           | 0.4  | 3.4  | 0.53 | 0.01 |
| TCGA-BC-A10W-0 called           | 0.56 | 4.38 | 0.74 | 0.02 |
| TCGA-LG-A6GG-0 called           | 0.71 | 2.43 | 0.75 | 0.09 |
| TCGA-RC-A6M5-0 called           | 0.22 | 3.59 | 0.34 | 0.08 |
| TCGA-BC-A8Y0-0 called           | 0.4  | 3.83 | 0.56 | 0.03 |
| TCGA-KR-A7K0-01 called          | 0.56 | 2.03 | 0.57 | 0.06 |
| TCGA-DD-A4NQ-0 called           | 0.29 | 6.28 | 0.56 | 0    |
| TCGA-DD-AAVZ-0 called           | 0.75 | 1.98 | 0.75 | 0.08 |
| TCGA-BC-A110-01 low purity      | NA   | NA   | NA   | NA   |
| TCGA-DD-A11C-0 called           | 0.24 | 3.9  | 0.39 | 0.01 |
| TCGA-DD-AAVX-0 called           | 0.75 | 2.13 | 0.76 | 0.01 |
| TCGA-DD-AAVY-0 called           | 0.99 | 2.23 | 0.99 | 0.04 |

|                                |      |      |      |      |
|--------------------------------|------|------|------|------|
| TCGA-NI-A4U2-01/called         | 0.68 | 1.99 | 0.68 | 0.03 |
| TCGA-PD-A5DF-01/called         | 0.74 | 1.99 | 0.73 | 0.08 |
| TCGA-G3-A3CK-01/called         | 0.53 | 2.08 | 0.54 | 0.04 |
| TCGA-ES-A2HS-01/called         | 0.46 | 3.46 | 0.6  | 0.05 |
| TCGA-DD-A73E-01high non-clonal | 0.77 | 2.06 | 0.78 | 0.29 |
| TCGA-4R-AA8I-01/called         | 0.84 | 1.93 | 0.83 | 0.04 |
| TCGA-2V-A95S-01 called         | 0.45 | 2.23 | 0.48 | 0.04 |
| TCGA-XR-A8TF-01 called         | 0.84 | 3.11 | 0.89 | 0.05 |
| TCGA-DD-A3A5-01called          | 0.82 | 2.01 | 0.82 | 0.09 |
| TCGA-DD-AACW-Ccalled           | 0.92 | 1.93 | 0.91 | 0.03 |
| TCGA-ZS-A9CF-01 called         | 0.89 | 3.86 | 0.94 | 0.05 |
| TCGA-DD-AADE-0 called          | 0.62 | 4.14 | 0.77 | 0.04 |
| TCGA-DD-AAD1-0 called          | 0.27 | 4.24 | 0.43 | 0    |
| TCGA-DD-AAEK-0 called          | 0.45 | 3.18 | 0.56 | 0.2  |
| TCGA-ED-A459-01high non-clonal | 0.5  | 3.58 | 0.65 | 0.3  |
| TCGA-DD-A73F-01 called         | 0.26 | 3.78 | 0.4  | 0    |
| TCGA-DD-AA3A-0' called         | 0.76 | 2.06 | 0.77 | 0.12 |
| TCGA-ZP-A9D4-01 called         | 0.41 | 4.22 | 0.59 | 0.03 |
| TCGA-G3-A25U-01 called         | 0.84 | 3.97 | 0.91 | 0.19 |
| TCGA-5R-AA1D-01low purity      | NA   | NA   | NA   | NA   |
| TCGA-2Y-A9HB-01called          | 0.44 | 4.23 | 0.62 | 0.15 |
| TCGA-BC-A10Q-0' called         | 0.65 | 4.16 | 0.8  | 0.02 |
| TCGA-BC-A10U-01 called         | 0.82 | 2.08 | 0.82 | 0.14 |
| TCGA-DD-AAE1-0' called         | 0.84 | 2.03 | 0.85 | 0.14 |
| TCGA-UB-A7MC-0 called          | 0.85 | 2.95 | 0.89 | 0.04 |
| TCGA-CC-A7IK-01.called         | 0.64 | 6.11 | 0.85 | 0.03 |
| TCGA-DD-AAVS-0 called          | 0.8  | 2.03 | 0.81 | 0.07 |
| TCGA-DD-A73G-0' called         | 0.26 | 5    | 0.46 | 0    |
| TCGA-DD-A116-01 called         | 0.71 | 1.91 | 0.7  | 0.16 |
| TCGA-DD-AAD8-0' called         | 0.95 | 3.53 | 0.97 | 0.13 |
| TCGA-DD-AAE2-0' called         | 0.24 | 3.38 | 0.35 | 0    |
| TCGA-G3-A25Z-01 called         | 0.63 | 4.03 | 0.77 | 0.07 |
| TCGA-WQ-AB4B-0 called          | 0.5  | 3.87 | 0.66 | 0.14 |
| TCGA-DD-AAID-01high non-clonal | 0.62 | 3.88 | 0.76 | 0.22 |
| TCGA-DD-AAW2-0called           | 0.89 | 2.28 | 0.9  | 0.05 |
| TCGA-GJ-A9DB-01high non-clonal | 0.73 | 1.99 | 0.73 | 0.23 |
| TCGA-DD-AADM-0called           | 0.37 | 4.42 | 0.56 | 0.02 |
| TCGA-2Y-A9H9-01 called         | 0.28 | 4.29 | 0.45 | 0.01 |
| TCGA-BC-A10S-01called          | 0.54 | 4.02 | 0.71 | 0.05 |
| TCGA-BC-A10R-01called          | 0.54 | 3.24 | 0.66 | 0.02 |
| TCGA-CC-5258-01 called         | 0.46 | 3.8  | 0.62 | 0.05 |
| TCGA-ED-A7PX-0' called         | 0.49 | 3.47 | 0.63 | 0.06 |
| TCGA-ZP-A9D2-01 called         | 0.56 | 3.81 | 0.71 | 0.06 |
| TCGA-CC-5263-01 called         | 0.23 | 3.83 | 0.37 | 0    |
| TCGA-DD-AAE6-0' called         | 1    | 4.18 | 1    | 0.09 |
| TCGA-DD-AAVW-Ccalled           | 0.43 | 3.99 | 0.6  | 0.04 |
| TCGA-DD-AADD-0 called          | 0.45 | 5.39 | 0.68 | 0.01 |
| TCGA-CC-A3MB-0 called          | 0.91 | 4.04 | 0.95 | 0.18 |
| TCGA-EP-A2KA-01called          | 0.53 | 2.33 | 0.57 | 0.08 |
| TCGA-2Y-A9HA-01called          | 0.35 | 4.06 | 0.52 | 0.06 |
| TCGA-BC-4072-01 called         | 0.59 | 2.18 | 0.61 | 0.11 |
| TCGA-DD-AADQ-0 called          | 0.72 | 4.28 | 0.84 | 0.05 |
| TCGA-CC-A7IL-01high non-clonal | 0.88 | 2.96 | 0.91 | 0.31 |
| TCGA-CC-A3MA-0 called          | 0.75 | 1.91 | 0.74 | 0.12 |
| TCGA-DD-AACS-0 called          | 0.84 | 3.97 | 0.91 | 0.13 |
| TCGA-DD-AACD-0 called          | 0.71 | 2.19 | 0.72 | 0.17 |
| TCGA-G3-A3CG-0 high non-clonal | 0.4  | 4.67 | 0.61 | 0.24 |
| TCGA-KR-A7K2-01called          | 0.71 | 3.8  | 0.83 | 0.16 |
| TCGA-CC-A5UE-0 high non-clonal | 0.94 | 3.85 | 0.97 | 0.73 |
| TCGA-2Y-A9H1-01 called         | 0.66 | 2.27 | 0.69 | 0.1  |
| TCGA-DD-AADF-0 called          | 1    | 3.25 | 1    | 0.13 |
| TCGA-CC-A8HV-0 called          | 0.51 | 6.71 | 0.78 | 0.01 |
| TCGA-DD-A39Y-01called          | 0.83 | 3.71 | 0.9  | 0.17 |
| TCGA-BC-A112-01 called         | 0.56 | 3.72 | 0.71 | 0.09 |
| TCGA-ED-A7XP-0' called         | 0.53 | 4.06 | 0.7  | 0.1  |
| TCGA-DD-AADW-C high non-clonal | 0.76 | 3.9  | 0.86 | 0.38 |
| TCGA-EP-A2KB-01high non-clonal | 0.55 | 4.04 | 0.71 | 0.23 |
| TCGA-CC-A7IE-01.called         | 0.54 | 4.51 | 0.72 | 0.15 |
| TCGA-K7-A6G5-01 called         | 0.59 | 2.11 | 0.6  | 0.1  |
| TCGA-DD-A115-01 called         | 0.23 | 3.51 | 0.34 | 0.03 |
| TCGA-2Y-A9H5-01 called         | 0.56 | 3.87 | 0.71 | 0.08 |
| TCGA-RC-A7SH-0 high non-clonal | 0.88 | 1.87 | 0.88 | 0.37 |
| TCGA-DD-A3A7-01called          | 0.34 | 5.33 | 0.58 | 0.01 |
| TCGA-RC-A7SF-01 called         | 0.74 | 2.13 | 0.75 | 0.19 |
| TCGA-DD-AACE-0 called          | 1    | 3.92 | 1    | 0.13 |
| TCGA-DD-A119-01high non-clonal | 0.25 | 4.7  | 0.44 | 0.3  |
| TCGA-DD-AACY-0 called          | 0.75 | 2.15 | 0.76 | 0.12 |
| TCGA-DD-AACI-01 called         | 0.24 | 5.33 | 0.45 | 0.05 |
| TCGA-G3-A25T-01 called         | 0.45 | 3.2  | 0.56 | 0.17 |
| TCGA-K7-A5RG-0' called         | 0.37 | 3.76 | 0.52 | 0.02 |
| TCGA-BC-A3KG-0 called          | 0.27 | 3.82 | 0.41 | 0.02 |
| TCGA-G3-A25Y-01 called         | 0.52 | 3.8  | 0.68 | 0.15 |
| TCGA-DD-AAD6-0 called          | 0.77 | 4.11 | 0.87 | 0.08 |
| TCGA-RC-A6M6-0 called          | 0.66 | 2.03 | 0.66 | 0.1  |
| TCGA-YA-A8S7-01high non-clonal | 0.37 | 3.71 | 0.52 | 0.35 |
| TCGA-FV-A310-01/called         | 0.48 | 3.64 | 0.62 | 0.2  |
| TCGA-5C-A9VH-01high non-clonal | 0.76 | 2.06 | 0.77 | 0.24 |
| TCGA-MI-A75I-01Acalled         | 0.62 | 2.01 | 0.62 | 0.1  |
| TCGA-DD-A4NQ-0 called          | 0.71 | 4.01 | 0.83 | 0.19 |
| TCGA-DD-AADC-0 called          | 0.57 | 3.96 | 0.72 | 0.06 |
| TCGA-DD-AADO-0 called          | 0.58 | 3.84 | 0.73 | 0.05 |
| TCGA-MI-A75G-01 called         | 0.3  | 4.28 | 0.48 | 0.01 |
| TCGA-EP-A3JL-01 called         | 0.25 | 2.92 | 0.33 | 0.01 |
| TCGA-ED-A97K-01called          | 0.53 | 4.38 | 0.71 | 0.18 |
| TCGA-CC-A7IF-01.called         | 0.72 | 3.93 | 0.84 | 0.18 |



|                                 |      |      |      |      |
|---------------------------------|------|------|------|------|
| TCGA-2Y-A9GS-01called           | 0.36 | 4.15 | 0.54 | 0.12 |
| TCGA-DD-AACG-0called            | 0.71 | 3.82 | 0.83 | 0.07 |
| TCGA-CC-A7IH-01 called          | 0.43 | 4.59 | 0.64 | 0.08 |
| TCGA-CC-A7IJ-01called           | 0.32 | 5.15 | 0.54 | 0.01 |
| TCGA-G3-AAV4-01called           | 0.83 | 3.74 | 0.9  | 0.09 |
| TCGA-UB-AA0U-0 called           | 0.63 | 4.25 | 0.78 | 0.1  |
| TCGA-G3-A7M6-0 called           | 0.57 | 4.29 | 0.74 | 0.05 |
| TCGA-BC-A3KF-01called           | 0.53 | 3.85 | 0.68 | 0.08 |
| TCGA-ZS-A9CE-01called           | 0.74 | 3.76 | 0.84 | 0.08 |
| TCGA-DD-A1EI-01.high non-clonal | 0.31 | 3.68 | 0.45 | 0.32 |
| TCGA-2Y-A9GU-0 called           | 0.77 | 4.11 | 0.87 | 0.15 |
| TCGA-BC-A10Y-01called           | 0.39 | 3.98 | 0.56 | 0.04 |
| TCGA-RC-A7SK-0 called           | 0.59 | 3.7  | 0.73 | 0.12 |
| TCGA-ED-A82E-01called           | 0.7  | 3.27 | 0.79 | 0.09 |
| TCGA-ZP-A9D1-01called           | 0.65 | 3.96 | 0.78 | 0.06 |
| TCGA-DD-AADL-0 called           | 0.27 | 6.24 | 0.53 | 0    |
| TCGA-2Y-A9H3-01high non-clonal  | 0.38 | 3.97 | 0.55 | 0.21 |
| TCGA-NI-A8LF-01called           | 0.29 | 4.73 | 0.49 | 0.01 |
| TCGA-DD-AACJ-0 called           | 0.91 | 4.71 | 0.96 | 0.16 |
| TCGA-KR-A7K8-01called           | 0.27 | 5.34 | 0.49 | 0.01 |
| TCGA-DD-AACP-0 called           | 0.8  | 2.89 | 0.86 | 0.12 |
| TCGA-XR-A8TG-0 called           | 0.23 | 4.2  | 0.38 | 0.01 |
| TCGA-RC-A6M3-0 called           | 0.56 | 4.13 | 0.73 | 0.09 |
| TCGA-DD-AAVV-0 called           | 0.36 | 3.5  | 0.5  | 0.19 |
| TCGA-DD-A3A3-01called           | 0.58 | 4.56 | 0.76 | 0.06 |
| TCGA-5R-AA1C-01called           | 0.87 | 2.28 | 0.88 | 0.07 |
| TCGA-DD-AAE0-0 called           | 0.7  | 3.19 | 0.79 | 0.19 |
| TCGA-CC-A3MC-0called            | 0.42 | 3.88 | 0.59 | 0.05 |
| TCGA-G3-AAV6-01high non-clonal  | 0.76 | 4.11 | 0.86 | 0.23 |
| TCGA-DD-AACZ-0 called           | 0.66 | 9.27 | 0.9  | 0.03 |
| TCGA-G3-AAV1-01high non-clonal  | 0.79 | 3.7  | 0.88 | 0.22 |
| TCGA-DD-AAED-0 called           | 0.88 | 3.7  | 0.93 | 0.11 |
| TCGA-ED-A66Y-01called           | 0.81 | 3.52 | 0.88 | 0.15 |
| TCGA-DD-AAE8-0 high non-clonal  | 0.91 | 3.87 | 0.95 | 0.3  |
| TCGA-CC-A9FU-0 high non-clonal  | 0.84 | 3.44 | 0.9  | 0.21 |
| TCGA-G3-A5SM-0 called           | 0.51 | 4.19 | 0.68 | 0.11 |
| TCGA-GJ-A3OU-0 called           | 0.43 | 4.01 | 0.6  | 0.1  |
| TCGA-2Y-A9H2-01 called          | 0.52 | 4.09 | 0.69 | 0.17 |
| TCGA-DD-AADN-0 called           | 0.27 | 4.53 | 0.45 | 0.05 |
| TCGA-CC-A1HT-0 called           | 0.47 | 3.93 | 0.63 | 0.11 |
| TCGA-DD-A39X-01called           | 0.34 | 3.74 | 0.49 | 0.19 |
| TCGA-BW-A5NO-0called            | 0.36 | 5.63 | 0.61 | 0.02 |
| TCGA-5C-A9VG-0 called           | 0.5  | 4.75 | 0.71 | 0.08 |
| TCGA-BC-A69H-01high non-clonal  | 0.68 | 4.07 | 0.81 | 0.29 |
| TCGA-BC-A217-01 called          | 0.26 | 5.25 | 0.48 | 0.05 |
| TCGA-FV-A496-01.called          | 0.84 | 3.6  | 0.9  | 0.09 |
| TCGA-DD-AACB-0 high non-clonal  | 0.92 | 4.38 | 0.96 | 0.24 |
| TCGA-DD-A4NA-0 called           | 0.64 | 3.68 | 0.77 | 0.18 |
| TCGA-BD-A3EP-0 called           | 0.37 | 4.31 | 0.56 | 0.03 |
| TCGA-DD-A1EJ-01called           | 0.34 | 4.6  | 0.54 | 0.02 |
| TCGA-CC-5264-01 high non-clonal | 0.84 | 3.19 | 0.9  | 0.46 |
| TCGA-2Y-A9GW-0 called           | 0.44 | 4.74 | 0.65 | 0.06 |
| TCGA-G3-AAV7-01high non-clonal  | 0.96 | 2.72 | 0.97 | 0.2  |
| TCGA-CC-A7II-01Acalled          | 0.36 | 7.99 | 0.69 | 0.03 |
| TCGA-DD-AAEE-0 called           | 0.74 | 3.92 | 0.85 | 0.12 |
| TCGA-ED-A8O6-0 called           | 0.57 | 3.98 | 0.73 | 0.1  |
| TCGA-FV-A311-01Acalled          | 0.5  | 3.88 | 0.66 | 0.1  |
| TCGA-DD-AACU-0 called           | 0.67 | 3.27 | 0.77 | 0.09 |
| TCGA-CC-A8HU-0 high non-clonal  | 0.78 | 4.31 | 0.89 | 0.23 |
| TCGA-CC-A3M9-0 called           | 0.21 | 4.98 | 0.4  | 0    |
| TCGA-BW-A5NP-0 high non-clonal  | 0.95 | 3.46 | 0.97 | 0.42 |
| TCGA-UB-A7MB-0 called           | 0.41 | 3.66 | 0.56 | 0.08 |
| TCGA-G3-A25S-01called           | 0.59 | 3.62 | 0.72 | 0.19 |
| TCGA-DD-A4NJ-01called           | 0.5  | 3.84 | 0.66 | 0.12 |
| TCGA-FV-A4ZP-01called           | 0.65 | 4.08 | 0.79 | 0.15 |
| TCGA-DD-A1EL-01high non-clonal  | 0.65 | 3.74 | 0.78 | 0.41 |
| TCGA-DD-A114-01called           | 0.45 | 3.84 | 0.61 | 0.08 |
| TCGA-CC-A5UC-0 called           | 0.36 | 4.19 | 0.54 | 0.13 |
| TCGA-DD-AACO-0called            | 0.75 | 3.85 | 0.85 | 0.18 |
| TCGA-DD-A11A-01called           | 0.31 | 7.61 | 0.63 | 0.02 |
| TCGA-DD-A4NN-0 called           | 0.84 | 2.04 | 0.84 | 0.18 |
| TCGA-G3-A7M9-0 called           | 0.41 | 9.33 | 0.76 | 0.01 |
| TCGA-CC-A7IG-01 called          | 0.38 | 4.62 | 0.59 | 0.06 |
| TCGA-ED-A7PZ-01high non-clonal  | 0.73 | 3.84 | 0.84 | 0.24 |
| TCGA-DD-A1EH-0 high non-clonal  | 0.85 | 1.99 | 0.85 | 0.35 |
| TCGA-DD-A1EG-0 called           | 0.38 | 4.08 | 0.56 | 0.12 |
| TCGA-UB-A7ME-0 called           | 0.45 | 3.44 | 0.58 | 0.1  |
| TCGA-DD-A113-01high non-clonal  | 0.6  | 3.92 | 0.75 | 0.21 |
| TCGA-G3-A25X-01high non-clonal  | 0.61 | 2.97 | 0.7  | 0.41 |
| TCGA-DD-A1EF-01called           | 0.22 | 4.95 | 0.41 | 0    |
| TCGA-RG-A7D4-0 high non-clonal  | 0.48 | 3.95 | 0.64 | 0.22 |
| TCGA-DD-AAD5-0 high non-clonal  | 0.6  | 3.99 | 0.75 | 0.21 |
| TCGA-DD-AADV-0 called           | 0.28 | 7.6  | 0.6  | 0    |
| TCGA-EP-A2KC-0 high non-clonal  | 0.65 | 2.25 | 0.68 | 0.36 |
| TCGA-2Y-A9GY-01high non-clonal  | 0.6  | 3.32 | 0.71 | 0.28 |
| TCGA-MR-A8JO-0 high non-clonal  | 0.76 | 2.03 | 0.76 | 0.42 |
| TCGA-DD-AADR-0 high non-clonal  | 0.62 | 3.97 | 0.76 | 0.42 |
